# Supplementary material for: Impact of Kidney Failure Risk Prediction Clinical Decision Support on Monitoring and Referral in Primary Care Management of CKD: A Randomized Pragmatic Clinical Trial
Source: PubMed Central journal article supplement — Kidney Med. 2022 May 28;4(7):100493. doi: 10.1016/j.xkme.2022.100493 (PMC9293940; doi:10.1016/j.xkme.2022.100493), 2022-05-28

**Figure S1.** CDS recommendation to order UACR and serum phosphorus for a patient who had not received these tests in the past 12 months.

**PARTNERS**  
HEALTHCARE

## Chronic Kidney Disease (CKD) Risk Tool

Load CCD   **CKD Risk**   App Settings   About

This patient has Stage 3a chronic kidney disease with [albuminuria not calculated]

**▲ 5-Year Kidney Failure Risk: 1.1 to 3.6%**

**Recommendation 1:** Order urine albumin and creatinine to calculate ACR

**Recommendation 2:** Order serum phosphorous

|                                               |                                          |
|-----------------------------------------------|------------------------------------------|
| <b>Patient's Last Name:</b>                   | MGHLMRECRSTEST                           |
| <b>Age (years):</b>                           | 105                                      |
| <b>Gender:</b>                                | male                                     |
| <b>eGFR (mL/min/1.73m<sup>2</sup>):</b>       | <input type="text" value="47"/>          |
| <b>Urine Albumin:Creatinine Ratio (mg/g):</b> | <input type="text" value="Not Present"/> |
| <b>Calcium (mg/dL):</b>                       | <input type="text" value="8.1"/>         |
| <b>Phosphorous (mg/dL):</b>                   | <input type="text" value="Not Present"/> |
| <b>Albumin (g/dL):</b>                        | <input type="text" value="3.2"/>         |
| <b>Bicarbonate (meq/L):</b>                   | <input type="text" value="27"/>          |

**Recalculate**

**Figure S2.** No CDS recommendation for a patient who had received all of the labs necessary to calculate KFRE in the past 12 months. This patient would have been excluded from the analysis of the primary outcome because no action was recommended to the PCP.

**PARTNERS** HEALTHCARE **Chronic Kidney Disease (CKD) Risk Tool**

Load CCD | **CKD Risk** | App Settings | About

This patient has Stage 2 chronic kidney disease with moderately increased albuminuria (A2).

**▲ 5-Year Kidney Failure Risk: 1.9%**

|                                               |                      |
|-----------------------------------------------|----------------------|
| <b>Patient's Last Name:</b>                   | Partnerstest         |
| <b>Age (years):</b>                           | 87                   |
| <b>Gender:</b>                                | Male                 |
| <b>Is African-American?:</b>                  | No                   |
| <b>eGFR (mL/min/1.73m<sup>2</sup>):</b>       | 60 (Creatinine: 1.1) |
| <b>Urine Albumin:Creatinine Ratio (mg/g):</b> | 50                   |
| <b>Calcium (mg/dL):</b>                       | 7.8                  |
| <b>Phosphorous (mg/dL):</b>                   | 5.6                  |
| <b>Albumin (g/dL):</b>                        | 2.9                  |
| <b>Bicarbonate (meq/L):</b>                   | 17                   |

Recalculate

**Figure S3.** CDS recommendation to refer patient to nephrology due to risk estimate >10%.

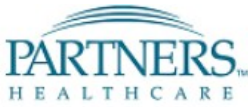

## Chronic Kidney Disease (CKD) Risk Tool

Load CCD   **CKD Risk**   App Settings   About

This patient has Stage 3b chronic kidney disease with severely increased albuminuria (A3).

**Recommendation 1: Seek referral to nephrologist**

**⚠ 5-Year Kidney Failure Risk: 21.3%**

|                                               |                                              |
|-----------------------------------------------|----------------------------------------------|
| Patient's Last Name:                          | BWHCKDRISKTEST                               |
| Age (years):                                  | 73                                           |
| Gender:                                       | Female                                       |
| Is African-American?:                         | No                                           |
| <u>Creatinine (mg/dL):</u>                    | <input type="text" value="1.5"/> ( eGFR: 34) |
| <u>Urine Albumin:Creatinine Ratio (mg/g):</u> | <input type="text" value="467"/>             |
| <u>Calcium (mg/dL):</u>                       | <input type="text" value="9.4"/>             |
| <u>Phosphorous (mg/dL):</u>                   | <input type="text" value="4.3"/>             |
| <u>Albumin (g/dL):</u>                        | <input type="text" value="2.4"/>             |
| <u>Bicarbonate (meq/L):</u>                   | <input type="text" value="23"/>              |

[Recalculate](#)

**Figure S4.** Two CDS recommendations to 1) refer patient to nephrology due to estimated range of risk which exceeds 10% and 2) order lab tests necessary to calculate KFRE.

 **Chronic Kidney Disease (CKD) Risk Tool**

[Load CCD](#) [CKD Risk](#) [App Settings](#) [About](#)

This patient has Stage 3b chronic kidney disease with moderately increased albuminuria (A2).

**▲ 5-Year Kidney Failure Risk: 8.6 to 12.1%**

**Recommendation 1:** Seek referral to nephrologist

**Recommendation 2:** Order serum phosphorous

|                                               |                                             |
|-----------------------------------------------|---------------------------------------------|
| <b>Patient's Last Name:</b>                   | BWHCKDRISKTEST                              |
| <b>Age (years):</b>                           | 73                                          |
| <b>Gender:</b>                                | Female                                      |
| <b>Is African-American?:</b>                  | No                                          |
| <b>Creatinine (mg/dL):</b>                    | <input type="text" value="1.3"/> (eGFR: 41) |
| <b>Urine Albumin:Creatinine Ratio (mg/g):</b> | <input type="text" value="235"/>            |
| <b>Calcium (mg/dL):</b>                       | <input type="text" value="9.4"/>            |
| <b>Phosphorous (mg/dL):</b>                   | <input type="text" value="Not Present"/>    |
| <b>Albumin (g/dL):</b>                        | <input type="text" value="2.4"/>            |
| <b>Bicarbonate (meq/L):</b>                   | <input type="text" value="23"/>             |

[Recalculate](#)

**Figure S5.** CONSORT flowchart: Participant enrollment, allocation, exclusion, and analysis for secondary outcome of nephrology referral

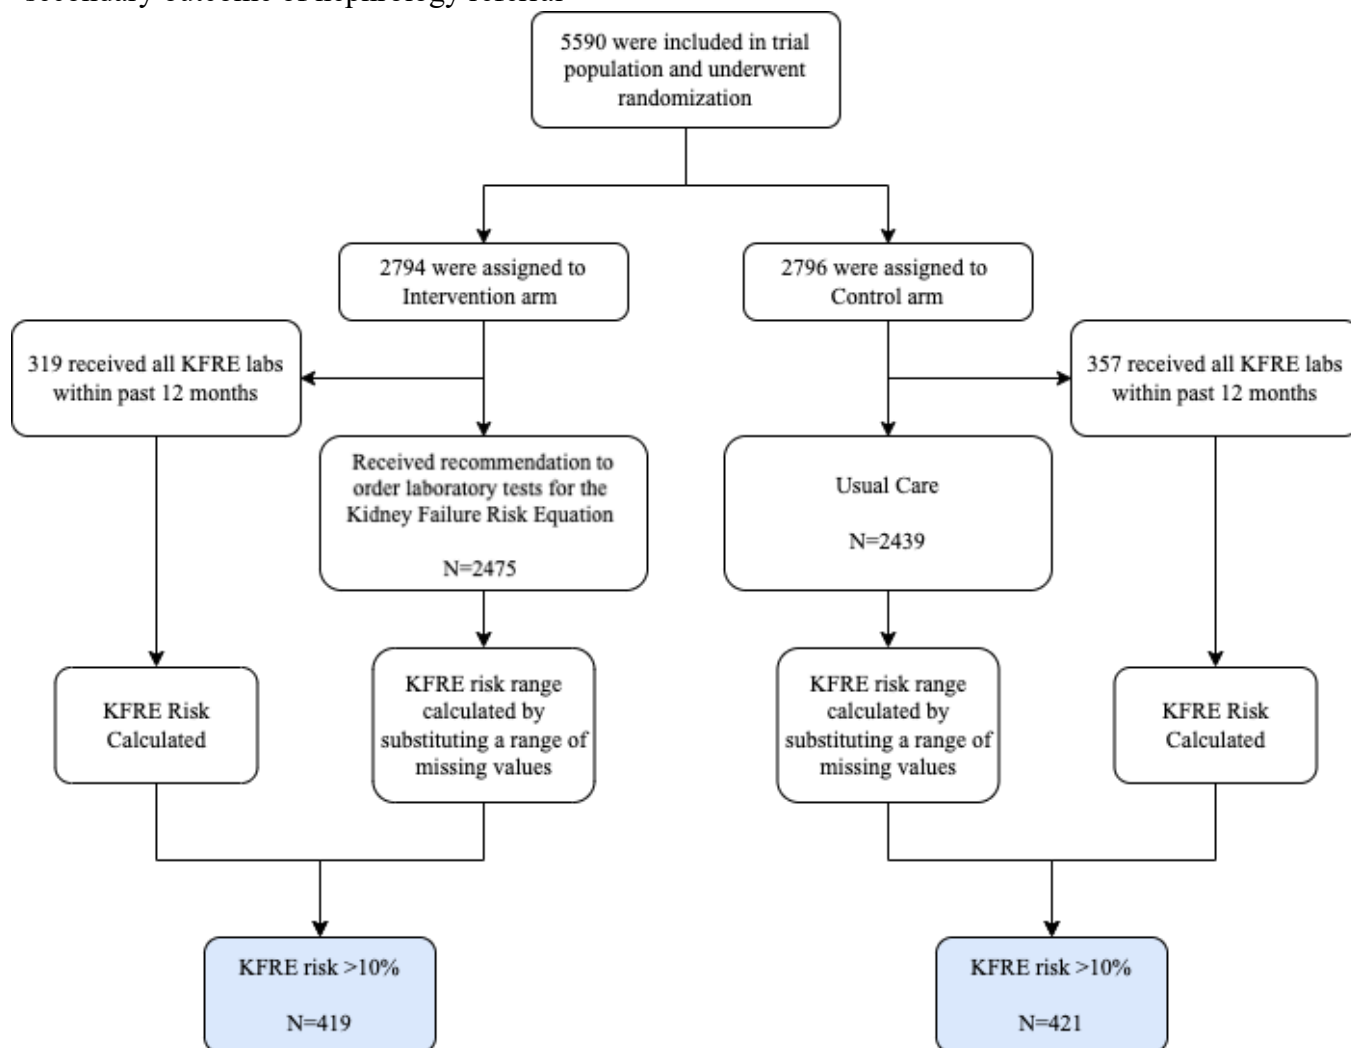

Supplement: mmc1.pdf [file mmc1.pdf]
